# Supplementary material for: Neurofunctional Differences Associated with Arithmetic Processing in Turner Syndrome
Source: Oxford University Press journal article supplement (doi:10.1093/cercor/bhj028), 2005-08-31
Supplement: bhj028_Supplementary_Data.zip [file bhj028_Supplementary_Data.zip]

Archive with 2 entries (2 files):
- bhj028supp1.pdf
- bhj028supp2.doc
